# Supplementary material for: Adenoviral Vectors Armed with PAPILLOMAVIRUs Oncogene Specific CRISPR/Cas9 Kill Human-Papillomavirus-Induced Cervical Cancer Cells
Source: PubMed Central journal article supplement (PMC7409089; doi:10.3390/cancers12071934), 2020-07-17
Supplement: cancers-12-01934-s001.pdf [file cancers-12-01934-s001.pdf]

Supplementary Materials

# Adenoviral Vectors Armed with PAPILOMAVIRUS Oncogene Specific CRISPR/Cas9 Kill Human-Papillomavirus-Induced Cervical Cancer Cells

Eric Ehrke-Schulz, Sonja Heinemann, Lukas Schulte, Maren Schiwon, and Anja Ehrhardt

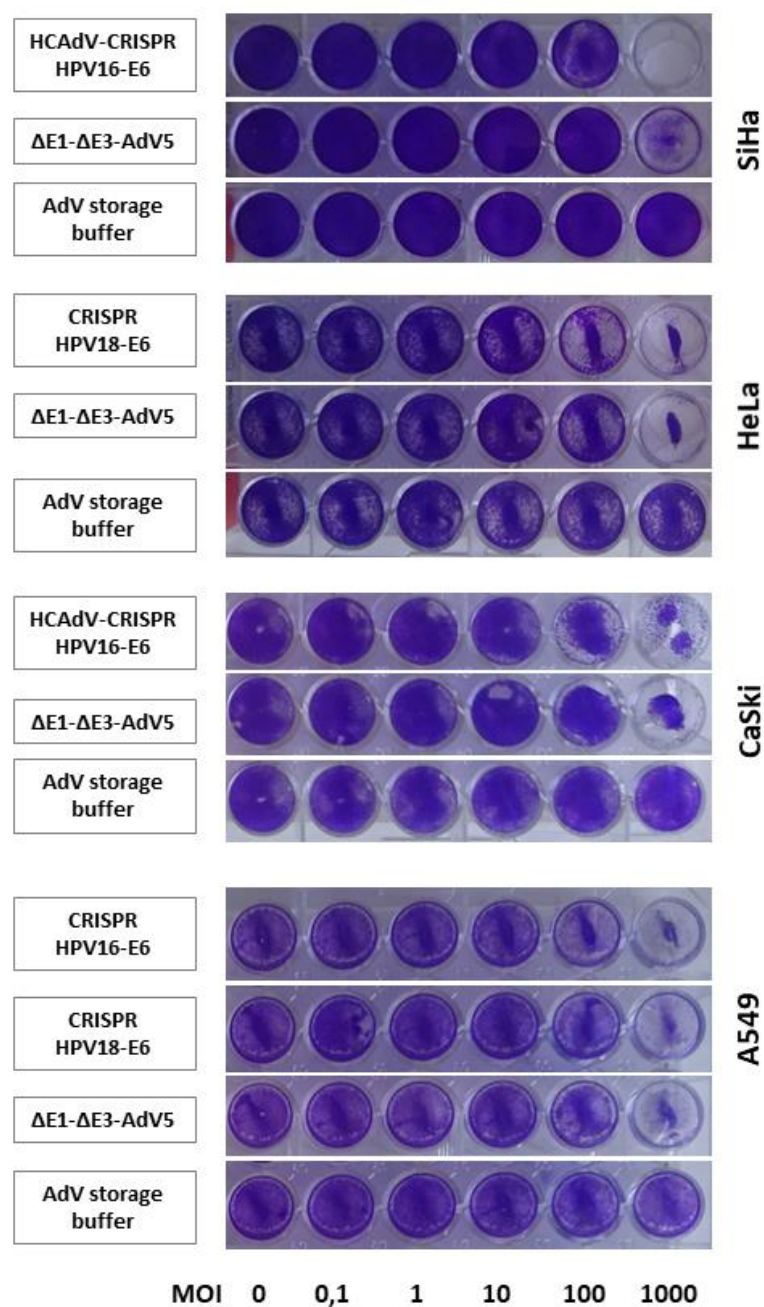

**Figure S1.** Oncolysis assay to monitor cell viability. Following transduction with HPV-E6 specific CRISPR/Cas9-HCA $\Delta$ V or AdNG163R-2 with increasing number of infectious vector particles per cell, HPV positive tumor-cells showed reduced viability compared to untreated controls at multiplicity (MOI) of 1000. AdV storage buffer treated cells were not affected.

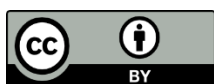

© 2020 by the authors. Licensee MDPI, Basel, Switzerland. This article is an open access article distributed under the terms and conditions of the Creative Commons Attribution (CC BY) license (<http://creativecommons.org/licenses/by/4.0/>).
